# Supplementary figures and images for: Evolutionary history of Otophysi (Teleostei), a major clade of the modern freshwater fishes: Pangaean origin and Mesozoic radiation
Source: Springer Nature journal article supplement (doi:10.1186/1471-2148-11-177), 2011-06-22

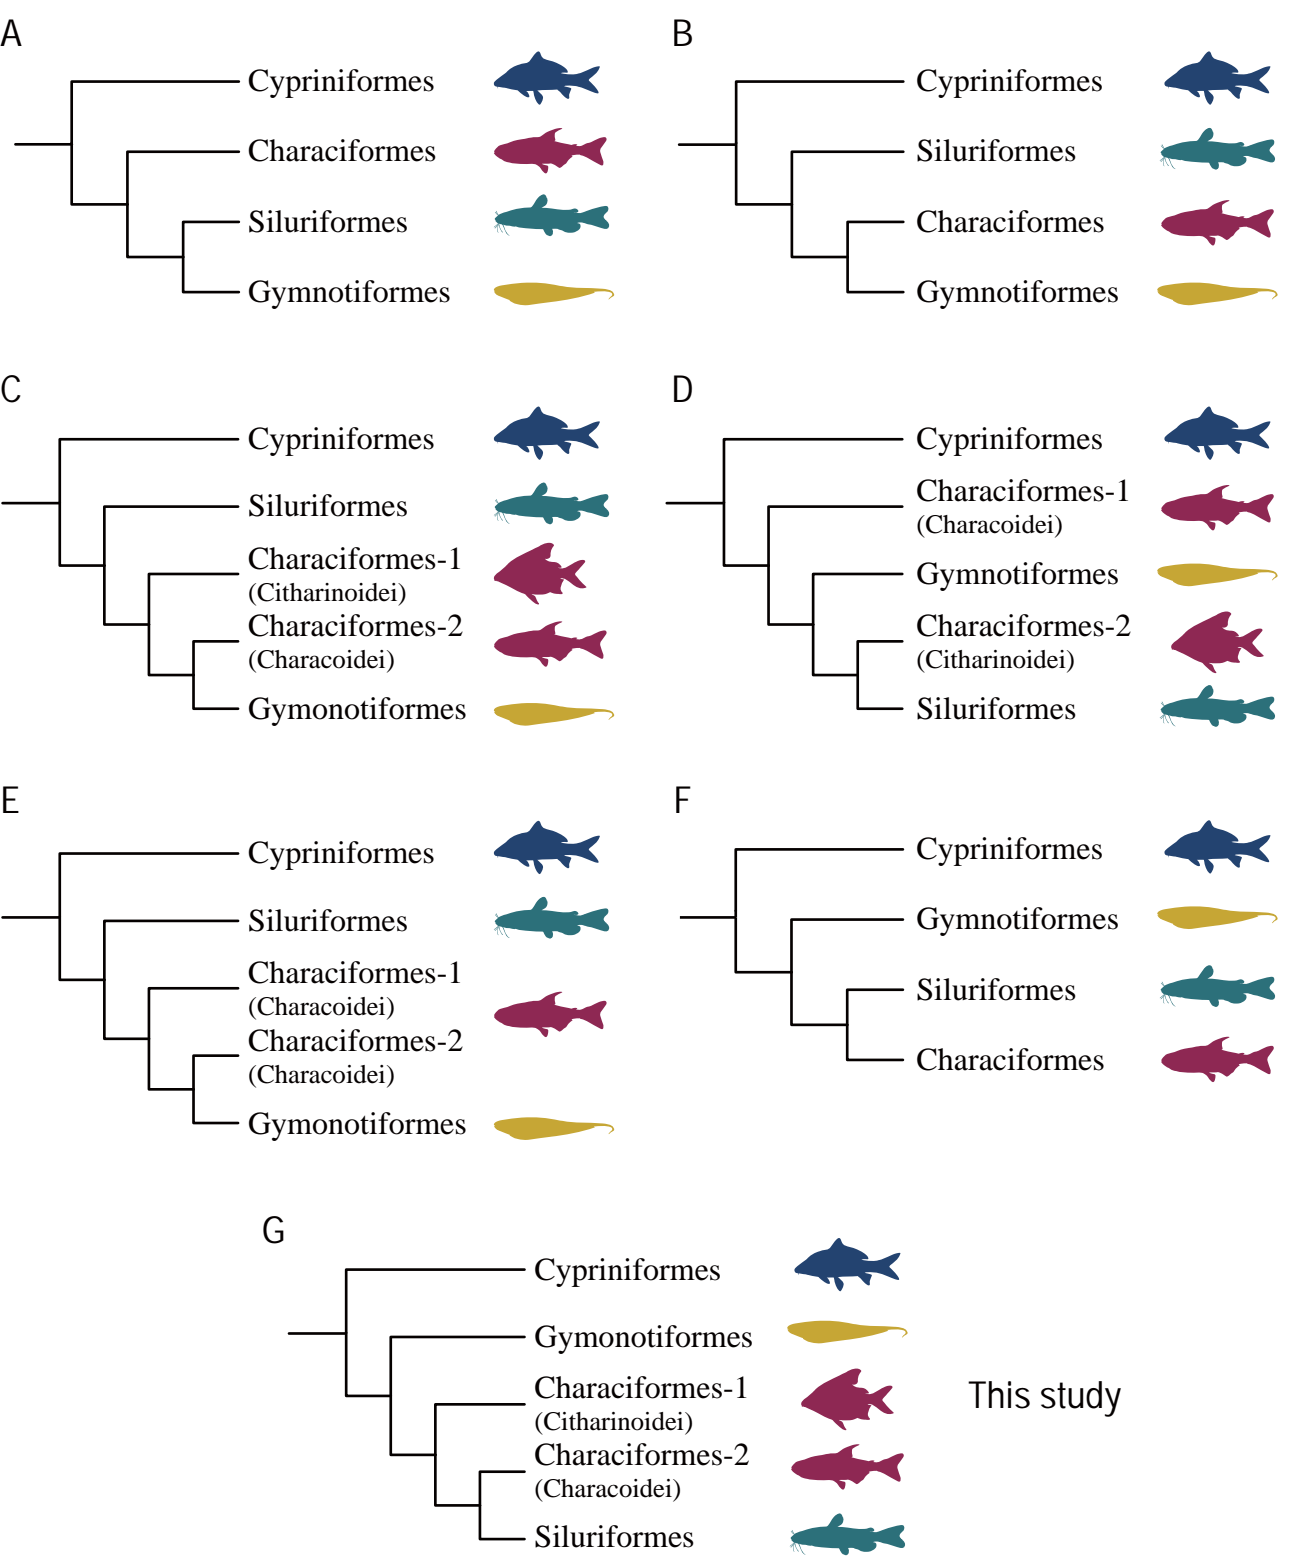

Supplement: 12862_2011_1779_MOESM5_ESM.pdf [file 12862_2011_1779_MOESM5_ESM.pdf]
